# Supplementary material for: Sex-Specific Dietary Patterns and Social Behaviour in Low-Risk Individuals
Source: MDPI journal article supplement (doi:10.3390/nu15081832), 2023-04-11
Supplement: s1 [file s1]

## Manuscript Supplement

**Supplementary Table S1** Assessment of social behaviour

| Assessment instruments                                                     | Study variable                                                                                                                                         |
|----------------------------------------------------------------------------|--------------------------------------------------------------------------------------------------------------------------------------------------------|
| Questionnaire (self-administered)                                          | Gender, age, income, dietary changes within a year prior to examination, alcohol consumption, current and former smoking status                        |
| Questionnaire (self-administered) and patient's file                       | Prevalent diseases (type 2 diabetes mellitus, arterial hypertension, dyslipidaemia)                                                                    |
| Patient's file                                                             | Height, medication (blood-thinning medications: Phenprocoumon, Warfarin, and further; anticoagulants: Dabigantran, Apixaban, Rivaroxaban, and further) |
| Calibrated mechanical column scale (Seca 709)                              | Weight                                                                                                                                                 |
| Blood sampling                                                             | Blood samples were taken and NT-proBNP (pg/mL) was determined as a cardiovascular risk related blood marker (Elecsys® proBNP II, Roche).               |
| 12-channel electrocardiogram (Schiller® CARDIOVIT AT-10 plus)              | Resting-heart rate                                                                                                                                     |
| Questionnaire (IPAQ-SF)                                                    | Physical activity                                                                                                                                      |
| Three-day dietary record                                                   | Dietary intake (energy intake, Mediterranean Diet Adherence Screener (MEDAS), Healthy Eating Index (HEI)                                               |
| <b>Social behaviour Items (scale from 0 (none) to 10 (strongly agree))</b> |                                                                                                                                                        |
| <b>Personality traits</b>                                                  |                                                                                                                                                        |
| risk taking                                                                | Are you generally a risk-taker, or do you try to avoid risk?                                                                                           |
| self-control                                                               | When I set my mind to something, I follow through.                                                                                                     |
| religiousness                                                              | How strongly religious do you consider yourself to be?                                                                                                 |
| <b>Political preferences</b>                                               |                                                                                                                                                        |
| conservative                                                               | I identify myself with conservative-oriented politics                                                                                                  |
| liberal                                                                    | I identify myself with liberal-oriented politics                                                                                                       |
| social                                                                     | I identify myself with social-oriented politics                                                                                                        |
| ecological                                                                 | I identify myself with ecological-oriented politics                                                                                                    |
| <b>Altruism</b>                                                            |                                                                                                                                                        |
| donation willingness                                                       | From my 50 Euro expense allowance I would like to donate __ Euro to UNICEF.                                                                            |
| club membership                                                            | Are you an active and/or passive member in a club                                                                                                      |
| time-discounting                                                           | In general, are you willing to give up something today in order to benefit from something in the future?                                               |

**Supplementary Table S2** Sex differences in food items of the Mediterranean Diet Adherence Screener

| MEDAS Items                                                                                                                                                          | Women<br>(N=27)  | Men<br>(N=75)    | Standardised<br>Test Statistic | p-value      |
|----------------------------------------------------------------------------------------------------------------------------------------------------------------------|------------------|------------------|--------------------------------|--------------|
| Olive Oil/Rapeseed Oil as main fat source for cooking                                                                                                                | 4 (14.8)         | 3 (4.0)          | 3.633                          | 0.057        |
| Vegetables                                                                                                                                                           | 5 (18.5)         | 11 (14.8)        | 0.223                          | 0.637        |
| Fruit                                                                                                                                                                | <b>1 (3.7)</b>   | <b>15 (20.0)</b> | <b>3.986</b>                   | <b>0.046</b> |
| Red meat, hamburger, sausages                                                                                                                                        | 13 (48.9)        | 25 (33.3)        | 1.864                          | 0.172        |
| Butter, margarine, cream                                                                                                                                             | <b>11 (40.7)</b> | <b>9 (12.0)</b>  | <b>10.301</b>                  | <b>0.001</b> |
| Sugar-sweetened beverages                                                                                                                                            | 16 (59.3)        | 46 (61.3)        | 0.036                          | 0.850        |
| Wine                                                                                                                                                                 | <b>3 (11.1)</b>  | <b>24 (32.0)</b> | <b>4.451</b>                   | <b>0.035</b> |
| Pulses                                                                                                                                                               | 3 (11.1)         | 4 (5.3)          | 1.037                          | 0.309        |
| Fish, seafood                                                                                                                                                        | 3 (11.1)         | 17 (22.7)        | 1.682                          | 0.195        |
| Pastry, such as cookie or cake                                                                                                                                       | 3 (11.1)         | 14 (18.7)        | 0.816                          | 0.366        |
| Nuts                                                                                                                                                                 | 8 (29.6)         | 14 (18.7)        | 1.410                          | 0.235        |
| Prefer white meat over red meat                                                                                                                                      | 6 (22.2)         | 18 (24.0)        | 0.035                          | 0.852        |
| Dishes with a sauce of tomato, garlic, onion sautéed in olive oil                                                                                                    | 3 (11.1)         | 14 (13.7)        | 0.210                          | 0.645        |
| *MEDAS Score                                                                                                                                                         | 3 (1,5)          | 3 (2,4)          | 0.320                          | 0.749        |
| Note. Data presented as amount (percent) and test statistics of Pearson's Chi Square. *Data presented as median (1st quartile, 3 rd quartile). Mann-Whitney U tests. |                  |                  |                                |              |

**Supplementary Table S3** Sex differences in the food items of the Healthy Eating Index (HEI)

| HEI Items                                                                           | Women<br>(N=27)       | Men<br>(N=75)         | Standardised<br>Test Statistic | p-value      |
|-------------------------------------------------------------------------------------|-----------------------|-----------------------|--------------------------------|--------------|
| Beverages                                                                           | 8.8 (5.7, 11.8)       | 8.5 (5.7, 11.8)       | 1.066                          | 0.287        |
| Vegetables                                                                          | <b>5.1 (3.6, 7.1)</b> | <b>3.4 (2.0, 5.6)</b> | <b>2.811</b>                   | <b>0.005</b> |
| Fruit                                                                               | 8.0 (4.8, 12.1)       | 9.1 (4.5, 12.8)       | 0.307                          | 0.759        |
| Cereal and potato                                                                   | 6.8 (4.9, 8.1)        | 7.5 (6.2, 8.5)        | 1.597                          | 0.110        |
| Dairy                                                                               | 6.0 (4.6, 8.9)        | 6.1 (4.2, 7.9)        | 0.979                          | 0.328        |
| Meat, sausage, fish, egg                                                            | 5.0 (3.7, 7.2)        | 4.3 (2.9, 5.8)        | 1.442                          | 0.149        |
| Fat, oil                                                                            | 7.2 (5.2, 8.9)        | 6.1 (5.0, 7.9)        | 1.043                          | 0.149        |
| Sweets, foods high in fat                                                           | 6.1 (4.4, 9.6)        | 7.6 (5.3,10.0)        | 1.285                          | 0.199        |
| Score                                                                               | 55.6 (48.6,<br>61.8)  | 54.8 (47.2, 59.3)     | 0.804                          | 0.421        |
| Note. Data presented as median (1st quartile, 3 rd quartile). Mann-Whitney U tests. |                       |                       |                                |              |

**Supplementary Table S4** Differences individuals with low and high willingness to donate in the food items of the Mediterranean Diet Adherence Screener

| Variables                                                                                                                                                     | Total<br>(N=102) | Low Donors<br>(N= 61) | High Donors<br>(N=41) | p-value      |
|---------------------------------------------------------------------------------------------------------------------------------------------------------------|------------------|-----------------------|-----------------------|--------------|
| Olive Oil/Rapeseed Oil as main fat source for cooking                                                                                                         | 7 (6.9)          | 4 (6.6)               | 3 (7.3)               | 0.882        |
| Vegetables                                                                                                                                                    | 16 (15.7)        | 9 (14.8)              | 7 (17.1)              | 0.752        |
| Fruit                                                                                                                                                         | 16 (15.7)        | 12 (19.7)             | 4 (9.8)               | 0.177        |
| Red meat, hamburger, sausages                                                                                                                                 | 38 (37.3)        | 20 (32.8)             | 18 (43.9)             | 0.255        |
| Butter, margarine, cream                                                                                                                                      | 20 (19.6)        | 13 (21.3)             | 7 (17.1)              | 0.597        |
| Sugar-sweetened beverages                                                                                                                                     | 62 (60.8)        | 40 (65.6)             | 22 (53.7)             | 0.227        |
| Wine                                                                                                                                                          | 27 (26.5)        | 19 (31.1)             | 8 (19.5)              | 0.192        |
| Pulses                                                                                                                                                        | 7 (6.9)          | 4 (6.6)               | 3 (7.3)               | 0.882        |
| Fish, seafood                                                                                                                                                 | 20 (19.6)        | 14 (23.0)             | 6 (14.6)              | 0.300        |
| Pastry, such as cookie or cake                                                                                                                                | 17 (16.7)        | 7 (11.5)              | 10 (24.4)             | 0.086        |
| Nuts                                                                                                                                                          | 22 (21.6)        | 16 (26.2)             | 6 (14.6)              | 0.163        |
| Prefer white meat over red meat                                                                                                                               | 24 (23.5)        | <b>10 (16.4)</b>      | <b>14 (34.1)</b>      | <b>0.034</b> |
| Dishes with a sauce of tomato, garlic, onion sautéed in olive oil                                                                                             | 14 (13.7)        | <b>11 (18.0)</b>      | <b>3 (7.3)</b>        | <b>0.056</b> |
| Note. Data presented as number (percent) and test statistics of Pearson's Chi Square. <sup>a</sup> No statistics could be computed for Olive Oil/Rapeseed Oil |                  |                       |                       |              |

**Supplementary Table S5** Linear regressions of social behaviour variables with HEI

| Model            | Unstandardized Coefficients |            | Standardized Coefficients | t     | Sig. | 95,0% Confidence Interval for B |             | Correlations |         |       | Collinearity Statistics |       |
|------------------|-----------------------------|------------|---------------------------|-------|------|---------------------------------|-------------|--------------|---------|-------|-------------------------|-------|
|                  | B                           | Std. Error | Beta                      |       |      | Lower Bound                     | Upper Bound | Zero-order   | Partial | Part  | Tolerance               | VIF   |
| donation         | .002                        | .006       | .029                      | .274  | .785 | -.011                           | .014        | .051         | .029    | .027  | .888                    | 1.126 |
| risk-taking      | .018                        | .078       | .027                      | .235  | .815 | -.136                           | .173        | .037         | .024    | .023  | .756                    | 1.322 |
| self-control     | -.043                       | .083       | -.060                     | -.519 | .605 | -.208                           | .122        | .051         | -.054   | -.052 | .748                    | 1.337 |
| religiousness    | .008                        | .055       | .016                      | .138  | .891 | -.102                           | .117        | .076         | .014    | .014  | .756                    | 1.322 |
| conservative     | .030                        | .061       | .063                      | .488  | .627 | -.091                           | .151        | .001         | .051    | .049  | .600                    | 1.668 |
| liberal          | -.007                       | .059       | -.014                     | -.115 | .909 | -.124                           | .111        | .060         | -.012   | -.011 | .692                    | 1.445 |
| social           | -.018                       | .082       | -.030                     | -.221 | .826 | -.181                           | .145        | .146         | -.023   | -.022 | .547                    | 1.828 |
| ecological       | .175                        | .080       | .305                      | 2.190 | .031 | .016                            | .333        | .271         | .223    | .219  | .514                    | 1.946 |
| time-discounting | -.028                       | .080       | -.040                     | -.347 | .729 | -.186                           | .130        | -.103        | -.036   | -.035 | .747                    | 1.339 |

a. Dependent Variable: HEI score modified

**Supplementary Table S6** Linear regression of social behaviour variables with MEDAS

| Model            | Unstandardized Coefficients |            | Standardized Coefficients Beta | t      | Sig. | 95,0% Confidence Interval for B |             | Correlations |         |       | Collinearity Statistics |       |
|------------------|-----------------------------|------------|--------------------------------|--------|------|---------------------------------|-------------|--------------|---------|-------|-------------------------|-------|
|                  | B                           | Std. Error |                                |        |      | Lower Bound                     | Upper Bound | Zero-order   | Partial | Part  | Tolerance               | VIF   |
| donation         | .001                        | .008       | .012                           | .118   | .907 | -.015                           | .016        | -.021        | .012    | .011  | .888                    | 1.126 |
| risk-taking      | .011                        | .097       | .012                           | .110   | .912 | -.182                           | .204        | .050         | .012    | .010  | .756                    | 1.322 |
| self-control     | .072                        | .103       | .076                           | .700   | .485 | -.133                           | .278        | .169         | .073    | .065  | .748                    | 1.337 |
| religiousness    | -.013                       | .069       | -.021                          | -.193  | .847 | -.150                           | .123        | .028         | -.020   | -.018 | .756                    | 1.322 |
| conservative     | -.076                       | .076       | -.121                          | -1.001 | .319 | -.227                           | .075        | -.161        | -.104   | -.093 | .600                    | 1.668 |
| liberal          | -.028                       | .074       | -.043                          | -.380  | .705 | -.175                           | .119        | .007         | -.040   | -.035 | .692                    | 1.445 |
| social           | -.196                       | .102       | -.241                          | -1.914 | .059 | -.399                           | .007        | .105         | -.196   | -.178 | .547                    | 1.828 |
| ecological       | .348                        | .099       | .456                           | 3.504  | .001 | .151                            | .546        | .373         | .343    | .327  | .514                    | 1.946 |
| time-discounting | -.102                       | .099       | -.111                          | -1.025 | .308 | -.299                           | .095        | -.213        | -.106   | -.096 | .747                    | 1.339 |

a. Dependent Variable: MEDAS score

**Supplementary Table S7** Moderation effect of sex for social behaviour with HEI

|                       | <b>interaction - p-value</b> | <b>R<sup>2</sup></b> | <b>OR per SD (95% CI)</b> | <b>p-value</b> |
|-----------------------|------------------------------|----------------------|---------------------------|----------------|
| willingness to donate | 0.299                        | 0.021                | -0.014 (-0.410/0.130)     | 0.560          |
| risk-taking           | 0.136                        | 0.032                | -0.272 (-0.632/0.870)     | 0.359          |
| self-control          | 0.531                        | 0.016                | 0.088 (-0.240/0.416)      | 0.660          |
| religiousness         | 0.530                        | 0.019                | -0.076 (-0.317/0.165)     | 0.604          |
| conservative          | 0.731                        | 0.010                | -0.043 (-0.290/0.204)     | 0.804          |
| liberal               | 0.890                        | 0.014                | -0.016 (-0.246/0.214)     | 0.707          |
| social                | 0.307                        | 0.036                | -0.126 (-0.401/0.148)     | 0.307          |
| ecological            | 0.722                        | 0.078                | 0.044 (-0.202/0.291)      | <b>0.046</b>   |
| time-discounting      | 0.314                        | 0.027                | -0.171 (-0.508/0.165)     | 0.438          |

**Supplementary Table S8** Moderation effect of sex for social behaviour with MEDAS

|                       | <b>interaction - p-value</b> | <b>R<sup>2</sup></b> | <b>OR per SD (95% CI)</b> | <b>p-value</b> |
|-----------------------|------------------------------|----------------------|---------------------------|----------------|
| willingness to donate | 0.426                        | 0.008                | -0.015 (-0.510/0.022)     | 0.856          |
| risk-taking           | 0.590                        | 0.007                | 0.132 (-0.354/0.619)      | 0.882          |
| self-control          | 0.194                        | 0.051                | 0.284 (-0.146/0.714)      | 0.162          |
| religiousness         | 0.951                        | 0.002                | 0.010 (-0.335/0.314)      | 0.981          |
| conservative          | 0.177                        | 0.035                | -0.149 (-0.475/0.177)     | 0.322          |
| liberal               | 0.752                        | 0.002                | -0.049(-0.358/0.259)      | 0.977          |
| social                | 0.729                        | 0.013                | -0.065 (-0.436/0.306)     | 0.736          |
| ecological            | 0.168                        | 0.156                | 0.221 (-0.095/0.536)      | <b>0.001</b>   |
| time-discounting      | 0.502                        | 0.050                | 0.151 (-0.293/0.595)      | 0.168          |

## Supplementary Figures

### Supplementary Figure S1.

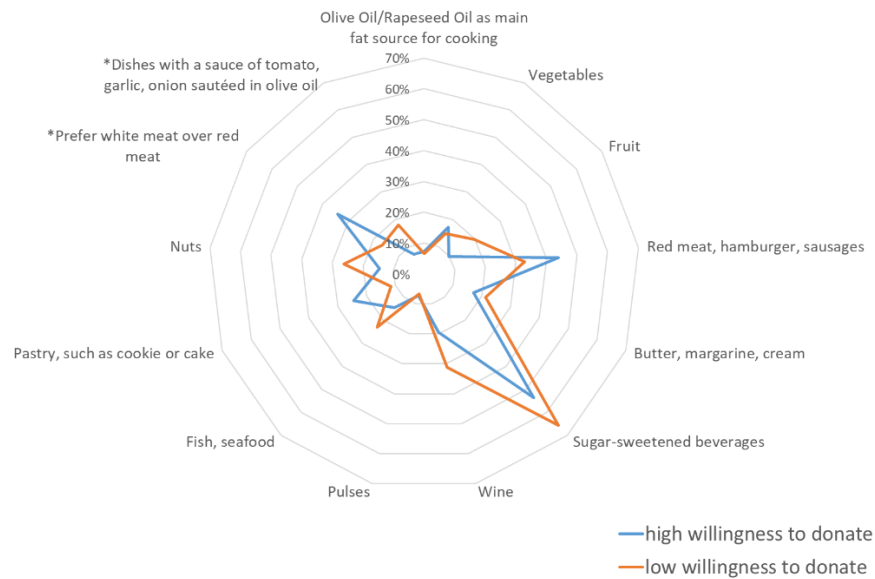

Dietary patterns of individuals with high (N=61) and low (N=41) willingness to donate according to average scores achieved for items in the Mediterranean Diet Adherence Screener (MEDAS). Note. The category “Olive oil, rapeseed oil” was excluded as no participant scored. Scores ranged. Scores ranged presented in percentages. \*  $p < 0.05$ .
